# Supplementary material
Source: PubMed Central journal article supplement (PMC3073705)

### Metformin

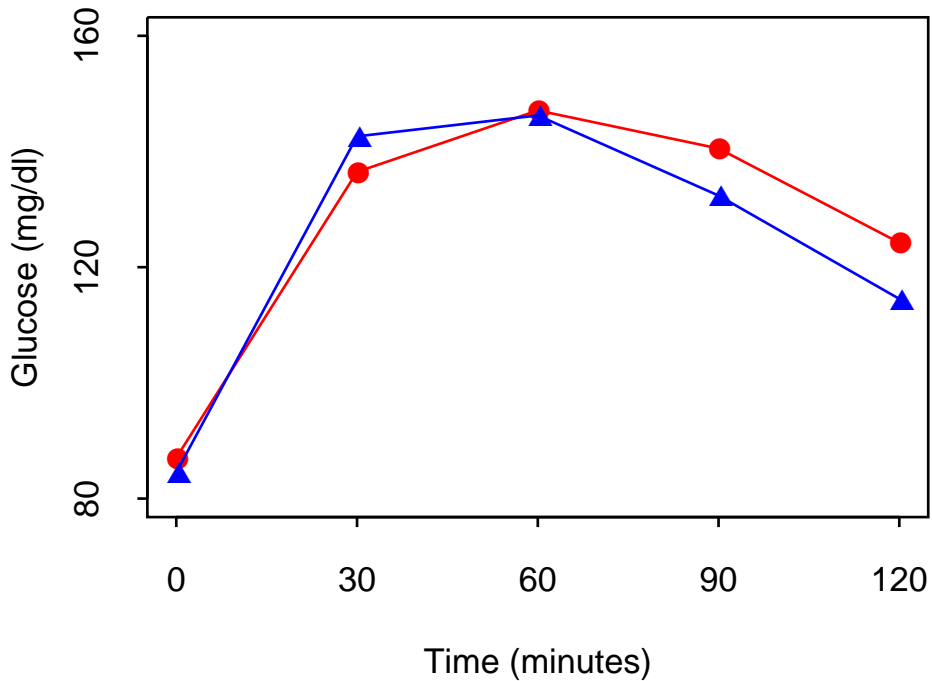

### Placebo

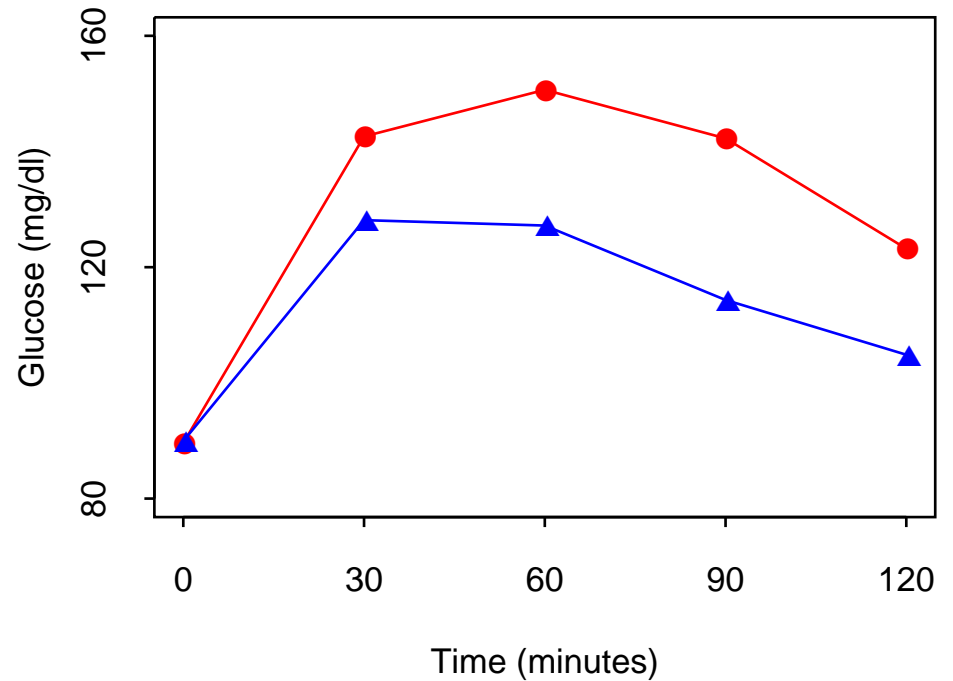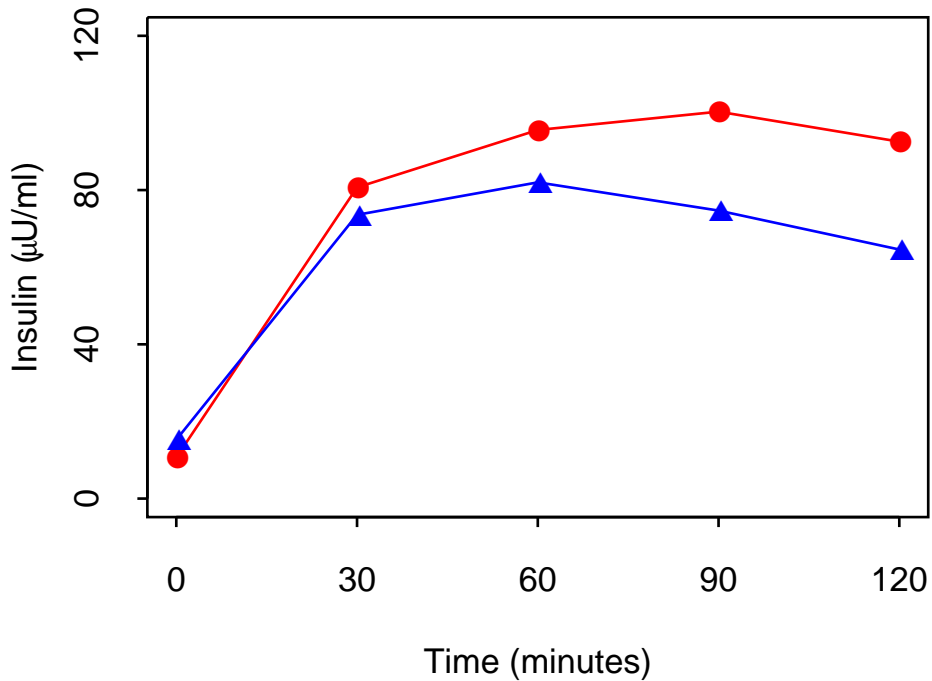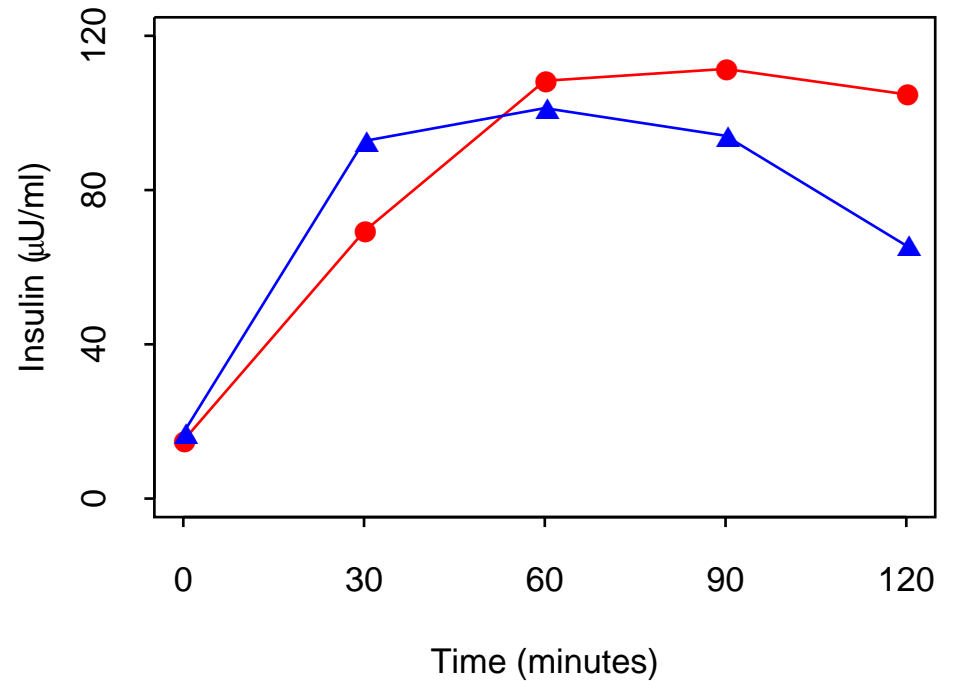

Supplement: NIHMS258084-supplement-1.pdf [file NIHMS258084-supplement-1.pdf]
